# Supplementary material
Source: publisher figshare collection journal article supplement (https://frontiersin.figshare.com/ndownloader/files/14994308)
Supplement: Supplementary file [file 14994308]

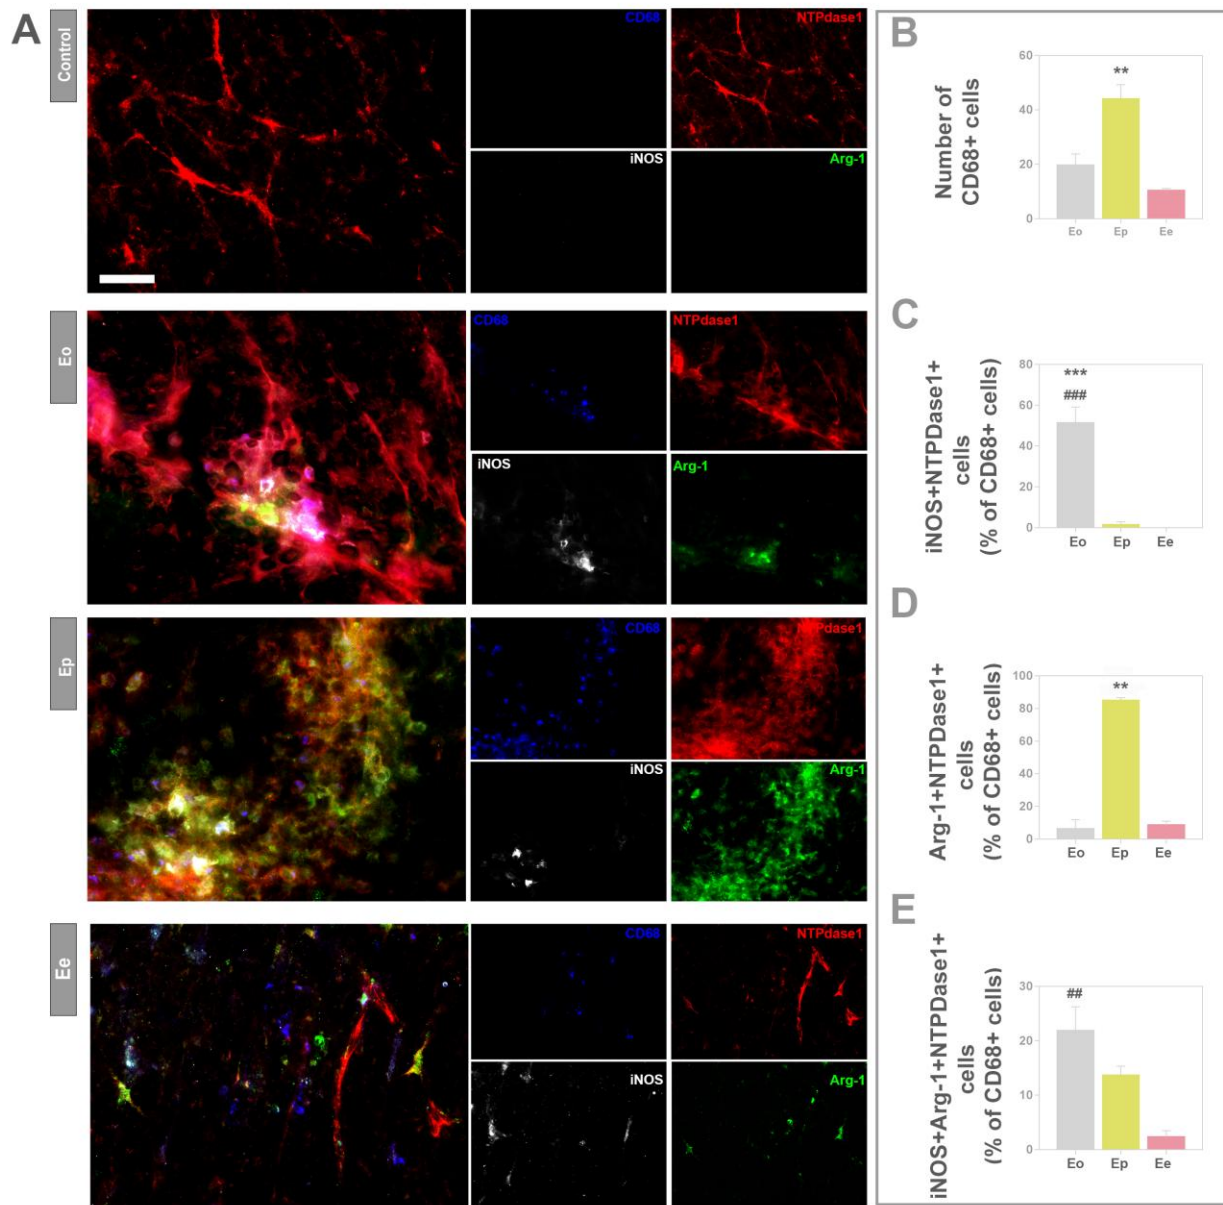

**Supplementary Fig. 3.** Functional state of NTPDase1 positive phagocytically active microglia/macrophages. Representative micrographs showing immunofluorescence labeling directed to NTPDase1 (*red fluorescence*), CD68 (*blue fluorescence*), iNOS (*white fluorescence*) and Arg1 (*green fluorescence*). Micrographs are obtained by overlay of triple NTPDase1/CD68/iNOS with Arg1 fluorescence of consecutive cross-sections obtained from control animals and during EAE (A). Scale bar applicable to all micrographs = 20  $\mu$ m. Quantification graphs showing number of CD68 positive cells per micrograph (B), fraction of iNOS/NTPDase1 (C), Arg1/NTPDase1 (D) and iNOS/Arg1/NTPDase1 (E) positive cells represented as fraction (%)  $\pm$  SEM of total CD68 positive cells. Significance inside the graphs: \*\* $p < 0.01$  between Ep and Ee in (B); \*\*\* $p < 0.001$  between Eo and Ep and ### $p < 0.001$  between Eo

and Ee in (C); \*\* $p < 0.01$  between Eo and Ep in (D) and <sup>##</sup> $p < 0.01$  between Eo and Ee in (E), Kruskal – Wallis with Dunn’s posthoc test.
